1 **Tailor-made sRNAs: a toolbox to control metabolic targets**

2

3 Patrícia Apura<sup>a</sup>, Alexandra Peregrina<sup>a</sup>, Margarida Saramago<sup>a</sup>, Sandra C. Viegas<sup>a</sup>, Sandra M. Carvalho<sup>b</sup>, Lúgia M.

4 Saraiva<sup>b</sup>, Susana Domingues<sup>a,✉</sup> and Cecília M. Arraiano<sup>a,✉</sup>

5

6 <sup>a</sup>Control of Gene Expression Lab/<sup>b</sup> Molecular Mechanisms of Pathogen Resistance Lab

7 Instituto de Tecnologia Química e Biológica António Xavier, Universidade Nova de Lisboa, Oeiras, Portugal

8

9 ✉ Corresponding authors: Cecília Maria Arraiano

10 Tel: +351 214469560

11 Fax: +351 214469549

12 E-mail: [cecilia@itqb.unl.pt](mailto:cecilia@itqb.unl.pt);

13

14 Susana Domingues

15 Tel: +351 214469560

16 Fax: +351 214469549

17 E-mail: [susanadomingues@itqb.unl.pt](mailto:susanadomingues@itqb.unl.pt)

18

19 Running title: Customized sRNAs to control gene expression

20

21 **Summary**

22 *Pseudomonas putida* is a highly attractive production system for industrial needs. Modulation of gene expression is  
23 an urgent need to redesign *P. putida* metabolism for its improvement as biocatalyst at industrial level. We report the  
24 construction of a small RNA-based system with potential to be used for different purposes in synthetic biology. Due  
25 to their modular composition, design facilities and ability in tuning gene expression, sRNAs constitute a powerful tool  
26 in genetic and metabolic engineering. In the toolbox presented here, the synthetic sRNA is specifically directed to  
27 any region of a chosen target. The expression of the synthetic sRNAs is shown to differentially modulate the level of  
28 endogenous and reporter genes. The antisense interaction of the sRNA with the mRNA results in different outcomes.  
29 Depending on the particularity of each sRNA-target mRNA pair, we managed to demonstrate the duality of this  
30 system, able either to repress or overexpress a given gene. This system combines a high specificity with a wide  
31 applicability due to its ability to modulate the expression of virtually any given gene. By plugging-in and -out genetic  
32 circuits, this tailor-made regulatory system can be used to redesign *P. putida* metabolism, fulfilling an important  
33 industrial gap in synthetic biology.

34

35 **Keywords**

36 Synthetic biology, control of gene expression, small non-coding RNAs, Hfq, *Pseudomonas putida*

37

38

## 39 Introduction

40 Modulation of protein expression has been a challenging task (Mahalik *et al.* 2014). The main problems arise  
41 from the accumulation of toxic intermediates, titration of co-factors and overburdening of the cell factory, which  
42 compromise cellular productivity. Some problems can be overcome with an adjustment of enzymes' levels using a  
43 combinatorial expression library (Lee *et al.* 2013). Typically, this implies the creation of libraries with changes in the  
44 involved genes. An ideal system would not rely in pre-constructed libraries, would have a dynamic range, could be  
45 programmable and would be non-toxic for the host. Good candidates for such system are small noncoding RNAs  
46 (sRNAs) (Ghodasara *et al.* 2017).

47 sRNAs are functional RNA molecules usually not translated and involved in many different cellular functions  
48 (Hor *et al.* 2018). Their versatility is attributable to their capacity to interact with RNA, DNA, proteins and small  
49 molecules. Most sRNAs directly base-pair with mRNA(s) to regulate one or more targets. *Cis*-encoded sRNAs are  
50 located on the opposite strand of their targets, having perfect complementarity. *Trans*-encoded sRNAs have a  
51 different genomic location and partial complementarity. Usually, the RNA chaperone Hfq helps binding to the targets  
52 and protects sRNAs from degradation (Wagner *et al.* 2015). Stretches of RNA located in the 5'- or 3'-end of mRNAs  
53 can function as sRNAs mediating RNA conformational changes. These are called riboswitches, and constitute the  
54 majority of synthetic sRNAs developed so far. They typically contain a sensor domain, plus a regulatory domain.  
55 Most require the fusion of target sequences to natural or modified sRNA scaffolds, which implies that they must be  
56 designed *ad hoc* for each target (Amman *et al.* 2012).

57 Inspired by the enormous versatility of RNA regulators, in this work we have explored *trans*-acting sRNAs  
58 since they allow the fine-tuning of desired genes and the identification of essential genes which cannot be identified  
59 by gene-knockout experiments (Yoo *et al.* 2013). Most studies have relied on random screening, but Na *et al.*  
60 showed the application of synthetic sRNAs rationally designed (Na *et al.* 2013). Based in this synthetic sRNA system  
61 developed for *Escherichia coli*, we have developed a new gene modulation system in *Pseudomonas putida*,  
62 considered one of the best hosts for optimization of product formation at the industrial level (Nikel *et al.* 2014). *P.*  
63 *putida* can withstand much stress, having higher productivity than other bacteria on a large scale. With this work we  
64 hope to have contributed to fill some of the gaps on industrial yields.

65 Our synthetic sRNAs comprise two parts: a seed sequence, which is a complementary sequence to the target  
66 mRNA (it can be directed to any region of the target), and a scaffold sequence that is responsible for the recruitment

57 of the RNA chaperone, Hfq. The interaction of the sRNA with the mRNA is expected to result in different outcomes,  
58 such as repression or improvement of target mRNAs translation, by changing access of the ribosomes to the  
59 Ribosome-binding site (RBS), and/or protection of mRNA transcript from ribonuclease cleavage. Indeed, we  
70 managed to differentially modulate the expression of endogenous and reporter genes.

71 The largest advantage of the system here presented is that it is a dual-system that can be applied to either  
72 increase or decrease the amount of protein produced by simply directing the synthetic sRNA to different regions of  
73 the target mRNA (5'-end, coding region or 3'-end). As such, it can be used to redesign the metabolism of *P. putida*  
74 improving its potential for biocatalysis at the industrial level.

75

## 76 **Experimental Procedures**

### 77 *Bacterial Strains, Plasmids and Growth conditions*

78 Strains and plasmids are listed in Table S1, and oligonucleotides in Table S2. Strains were grown in Luria-  
79 Bertani (LB) supplemented with the antibiotics kanamycin (50 µg/ml), gentamicin (10 µg/ml) or carbenicillin (100  
80 µg/ml), whenever required. *E. coli* was grown at 37°C and *P. putida* at 30°C, both under agitation (180 rpm).

81 pSEVA238 (Silva-Rocha *et al.* 2013) was amplified with primers containing a 5'-tail with the MicC scaffold  
82 sequence (Na *et al.* 2013). Primers SMD154 and SMD155 contain respectively the upstream and downstream region  
83 of the MicC scaffold. The 3'-end of these primers is complementary to pSEVA238 so that the MicC scaffold could be  
84 inserted exactly at the +1 of the *XylS/Pm* promoter. The amplified fragment was purified with NucleoSpin Gel and  
85 PCR clean-up (Macherey-Nagel) and ligated with T4 DNA Ligase (Thermo-Fisher). This construction (named  
86 pSEVA238-MicC) was transformed into KT2440 wild-type, KT-GFP and KT-YFP strains, used as controls in  
87 fluorescence assays.

88 To insert seed sequences (20-25 nts) into pSEVA238-MicC upstream of MicC scaffold, the same PCR  
89 amplification strategy was used. The following primer pairs used were: SMD144 and SMD158 (targeting the 5'-end of  
90 *acnB* mRNA); SMD146 and SMD159 (targeting an internal *sdhB* mRNA region); SMD160 and SMD161 (targeting the  
91 5'-end of *gfp* mRNA); SMD162 and SMD163 (targeting the 5'-end of *yfp* mRNA); SMD168 and SMD169 (targeting the  
92 3'-end of *gfp* mRNA); SMD170 and SMD171 (targeting an internal region of *gfp* mRNA). Binding energies were  
93 calculated using UNAFold software (Markham *et al.* 2008) and the absence of potential off-targets was checked with  
94 RNAPredator (Eggenhofer *et al.* 2011). Fragments containing seed sequences complementary to mRNA of the

35 fluorescent markers were transformed into strains containing the respective reporter in the chromosome (KT-GFP or  
36 KT-YFP), whilst those with complementarity to *acnB* or *sdhB* transcripts were transformed into *P. putida* KT2440.  
37 Electrocompetent *P. putida* KT2440 cells were prepared as described (Choi *et al.* 2006), and electroporated with 500  
38 ng of plasmid DNA. All plasmid constructions were confirmed by sequencing. DNA sequencing and oligonucleotide  
39 synthesis were performed by Stab Vida, Portugal.

00

#### 01 *Purification of Recombinant P. putida Hfq*

02 *P. putida* KT2440 Hfq protein fused to a histidine tag was overexpressed from a BL21(DE3) *hfq* null strain and  
03 purified by affinity chromatography, as described in (Madhushani *et al.* 2015).

04

#### 05 *In vitro Transcription*

06 MicC scaffold was generated and <sup>32</sup>P-labelled by *in vitro* transcription from a synthetic DNA template  
07 (MicC\_T7, Table S2) with a commercial T7 Promoter similarly to (Milligan *et al.* 1987, Saramago *et al.* 2018).  
08 Riboprobe synthesis and oligoprobe labelling were performed as described (Viegas *et al.* 2007). *acnB*, *sdhB* and *micC*  
09 scaffold riboprobe templates were generated by PCR with primers SMD122/SMD113, SMD120/SMD114 and  
10 MicC\_F/MicC\_R, respectively.

11

#### 12 *Electrophoretic Mobility Shift Assays (EMSA)*

13 <sup>32</sup>P-labelled MicC was diluted in 10 mM of Tris-HCl pH 8 and incubated 10 min at 80°C, followed by 45 min at  
14 37°C to acquire its secondary conformation. 0.075 pmol of MicC were then incubated with increasing concentrations  
15 of purified Hfq in Binding Buffer (20 mM Tris-HCl pH 8, 35 mM KCl, 2 mM MgCl<sub>2</sub>), 20 U of RNasin (Promega) and 1 µg  
16 of Yeast RNA (Ambion) in volume of 20 µl, at 20°C for 30 min. Binding reactions were mixed with 2µl of loading  
17 buffer (48% glycerol, 0.01% bromophenol blue) and electrophoresed on 4% polyacrylamide gel in 0.5X TBE Buffer pH  
18 8 at 200 V. Gels were visualized by PhosphorImaging (FUJI TLA-5100 scanner).

19

#### 20 *Spectrofluorimetry Experiments*

21 Total fluorescence was measured along growth in M9 medium using 96-well plates in a FLUOstar OPTIMA  
22 (BMG Labtech). Background was determined against control *P. putida* KT2440 carrying pSEVA238-MicC plasmid.

23 Overnight cultures were diluted to  $OD_{600} \sim 0.05$  and induced with 1 mM or 5 mM of 3-methylbenzoate (3-MB).  
24 Samples were measured in triplicates (200  $\mu$ l). Wavelengths were set to 485 nm and 520 nm for both reporters, GFP  
25 and YFP. The gain was set to 1000 for GFP and to 1750 for YFP. Total fluorescence was calculated as described (de  
26 Jong *et al.* 2010). The results are a mean of at least 5 independent experiments.

27

### 28 *Enzymatic Activities*

29 Overnight cultures were diluted to  $OD_{600} \sim 0.05$  and induced with 1 mM of 3-MB for 150 min. Aconitase  
30 activity was measured as before (Tavares *et al.* 2011) by following the production of NADPH ( $\epsilon_{340 \text{ nm}} = 6.22 \text{ mM}^{-1} \text{ cm}^{-1}$   
31 <sup>1</sup>). Succinate dehydrogenase activity was measured as before (Fernandes *et al.* 2001), using the phenazine  
32 methosulfate (PMS)-coupled reduction of dichlorophenolindophenol (DCPIP) ( $\epsilon_{578 \text{ nm}} = 18 \text{ mM}^{-1} \text{ cm}^{-1}$ ). One unit was  
33 defined as the enzyme catalysing conversion of 1 nmol of substrate per minute, at 25°C, under the experimental  
34 conditions used.

35

### 36 *RNA Extraction and Northern Blotting*

37 Overnight cultures were diluted and immediately induced with 1 mM of 3-MB, incubated 150 min, or grown  
38 to a cell density of 0.5 at  $OD_{600}$  before induction. Total RNA was extracted using Trizol reagent (Ambion). 15  $\mu$ g of  
39 total RNA was then separated under denaturing conditions either by 8.3M urea/8% polyacrylamide gel in TBE or by  
40 1% agarose MOPS/formaldehyde gel, and Northern blot performed as described (Viegas *et al.* 2007). Visualization  
41 was performed in FUJI TLA-5100 scanner and analysis with ImageQuant software (GE Healthcare).

42

## 43 **Results**

### 44 *Construction of a synthetic sRNA-based expression system*

45 Most synthetic sRNAs are engineered by fusing a target specific sequence to a naturally occurring sRNA  
46 scaffold. In a previous work aimed at designing synthetic sRNAs for metabolic engineering in *E. coli*, a screen of 101  
47 *E. coli* sRNAs has selected the MicC scaffold for its superior repression capability (Na *et al.* 2013). Thus, although a  
48 MicC homologous sRNA could not be found in *P. putida*, we wanted to test if MicC could be used as a scaffold in this  
49 bacterium. Since recruiting of Hfq to the sRNA scaffold should stabilize the sRNA and facilitate its hybridization with  
50 the target mRNA as well as mRNA degradation (Aiba 2007), binding of Hfq is an important step in the sRNAs-

51 mediated regulation of gene expression. Thus, we first wanted to test if *P. putida* Hfq would recognize and bind the  
52 scaffold of *E. coli* MicC. In order to do that, we have overexpressed and purified *P. putida* Hfq to near homogeneity  
53 (Supplementary Fig. S1A) and tested its ability to bind the MicC scaffold by EMSA (Electrophoretic Mobility Shift  
54 Assay). As shown in Supplementary Fig. S1B, incubation of free MicC scaffold with increasing concentrations of  
55 purified Hfq led to the formation of Hfq-MicC complexes, which were observed concomitantly with the  
56 disappearance of free MicC. This result confirms the ability of *P. putida* Hfq to bind the *E. coli* MicC scaffold and  
57 further validates its utilization as a synthetic sRNA scaffold in *P. putida*. Therefore, in order to construct an inducible  
58 synthetic sRNA expression system functional in *P. putida*, the *E. coli* MicC scaffold was cloned into the pSEVA238  
59 plasmid (Fig. 1A) yielding pSEVA238-MicC. In this plasmid, gene expression is driven from the inducible *P. putida*  
60 native promoter *XylS/Pm*. This regulator/promoter system has been widely used for regulated gene expression and it  
61 is suitable for use in metabolic engineering (recently reviewed in (Gawin *et al.* 2017). MicC scaffold was cloned  
62 exactly in the +1 position relative to the *Pm* promoter, so that addition of a target specific sequence (seed sequence)  
63 immediately upstream of MicC scaffold will allow the expression of a target specific synthetic sRNA after induction  
64 (Fig. 1B).

55 Before proceeding, it was of interest to check out MicC scaffold expression from this system. To this end,  
56 Northern blot experiments were conducted and MicC scaffold expression was evaluated before and after induction  
57 of KT2440 carrying pSEVA238-MicC with 3-methylbenzoate (3MB). No MicC expression was detected before  
58 induction. However, a band corresponding to MicC scaffold could be readily detected 15 min after 3MB addition and  
59 an increased expression could be observed 60 min after induction (Fig. 1C). Taken together these results  
60 substantiate the utilization of this system for the expression of MicC-based synthetic sRNAs in *P. putida* and  
61 encourage its further utilization for modulation of gene expression in this bacterium.

72

### 73 *Downregulation of P. putida cellular targets*

74 The usefulness of this system is dependent on whether it will fit applications on the regulation of cellular  
75 endogenous genes. Thus, downregulation of gene expression by the pSEVA238-MicC regulatory system was first  
76 assayed in the context of endogenous cellular genes. Since enzymes of the TCA cycle may be preferential targets for  
77 redesigning *P. putida* metabolism, aconitase B and succinate dehydrogenase B were the selected candidates in this  
78 work. Two sequences complementary to *acnB* and *sdhB* (genes encoding aconitase B and succinate dehydrogenase B

79 enzymes, respectively) mRNAs were designed and introduced into pSEVA238-MicC upstream of the MicC scaffold.  
80 We wanted to test sRNA interaction with different regions of the target mRNA molecules. Thus, the sequence  
81 chosen for *acnB* targetting hybridized with its 5'-UTR, encompassing the RBS and extended to the translation start  
82 codon, whilst a sequence complementary to the coding region was chosen for *sdhB* (Fig. 2A). The outcome was  
83 inspected by determining the aconitase or succinate dehydrogenase activities in cellular extracts after respectively  
84 inducing the expression of the sRNA directed to *acnB* or *sdhB* targets. As a control, the activity of the same strain  
85 expressing the MicC scaffold without the seed sequences was measured in the same conditions. Our data showed  
86 that in cells of *P. putida* expressing the sRNAs directed to *acnB* and *sdhB* transcripts, the aconitase and succinate  
87 dehydrogenase activities decreased by approximately 40% and 20%, respectively, relative to control sample cells  
88 (Fig. 2B). These results indicate that the expression of the specific synthetic sRNAs led to lower protein levels, as  
89 judged by the decreased enzyme activities determined in the cell extracts.

90 The reduction of the protein levels could be due to changes in the amount of the target mRNAs, derived  
91 from direct mRNA destabilization by the synthetic sRNAs or inhibition of translation, or both. We decided to evaluate  
92 the levels of the target mRNAs to discriminate between these hypotheses. The expression levels of the synthetic  
93 sRNAs and respective target mRNAs was analysed by Northern blot. As expected, expression of the synthetic sRNAs  
94 *Anti*acnB*-5'* and *Antis*sdhB*-intra* was readily observed after induction of *XylS/Pm* with 3MB (Supplementary Fig. S2).  
95 The concomitant decreased level of the *acnB* mRNA observed after 3MB induction is indicative of direct  
96 destabilization of this message by the sRNA *Anti*acnB*-5'* (Fig. 2C). The same was not observed when analysing the  
97 *sdhB* message, as no changes could be detected in its amount before or after *Antis*sdhB*-intra* induction, indicating no  
98 evidence of altered mRNA stability (Fig. 2C). Thus, in this case only differences in translation efficiency might be  
99 accounting for the final protein level.

100 Together, these results demonstrate the ability of MicC-based synthetic sRNAs to regulate the level of  
101 cellular mRNAs in *P. putida*, whether by interfering with the degradation mechanism or with the translation of the  
102 target mRNAs or possibly acting simultaneously at both levels.

103

#### 104 *Modulation of reporter genes expression*

105 As a proof of concept, it was of interest to try this system on the regulation of reporter genes. Modulation of  
106 reporter genes expression by the pSEVA238-MicC regulatory system was assayed on strains individually carrying the



07 reporter genes GFPmut3 and eYFP (Table S1). We have designed sequences complementary to the translation  
08 initiation region (TIR) of each reporter gene in order to create specific synthetic sRNAs directed to the 5'-end of the  
09 reporter transcripts. Again, hybridization of the seed sequence with the respective mRNA is expected to change its  
10 expression level. To experimentally validate this hypothesis, the fluorescence level of the reporters was evaluated by  
11 spectrofluorimetry after induction of the respective synthetic sRNAs. As control, the fluorescence level of the same  
12 strains containing only the MicC scaffold (without the seed sequence) was measured in the same conditions. For  
13 both reporters, a reduced level of fluorescence was detected after expression of the synthetic sRNAs containing the  
14 seed sequences, in comparison with the fluorescence level of the respective control strains (Fig. 3A). According to  
15 these results, the fluorescence signal emitted by GFP and YFP was lowered by about 25% and 20%, respectively.  
16 Thus, as observed for the cellular targets, expression of these synthetic sRNAs might be impairing translation and/or  
17 destabilizing the target mRNAs, leading to a decreased level of the respective fluorescent protein, and ultimately  
18 decreasing the fluorescence emitted by the strains. This confirms our previous results with the endogenous cellular  
19 genes and further validates this system as a promising toolbox to modulate gene expression in *P. putida*.

20

21 sRNAs are potent modulators of gene expression, with the versatile ability not only to downregulate the  
22 expression of their targets, but also with the aptitude to stabilize and/or increase translation of the targeted  
23 transcripts, as illustrated by a handful of examples in the literature (reviewed by (Saramago *et al.* 2014)). This  
24 versatility, which is related with the hybridization region, may be especially interesting in this context, since it should  
25 be possible to apply the same synthetic sRNA system to downregulate or upregulate a gene of interest. The choice of  
26 the region where the sRNA will hybridise with the target is determinant for the type of control, and only by changing  
27 the seed complementarity to a different region of the transcript, it should be possible to differently modulate its  
28 expression. As such, we thought that by directing the seed sequence to a different region of the *gfp* transcript that  
29 would change its expression differently. This hypothesis was addressed by designing a sequence complementary to  
30 the 3'-end of the *gfp* mRNA, a region generally known to have a great impact on RNA stability by being targeted by  
31 several exoribonucleases (that cleave RNA in the 3'-5' direction). It was also of interest to test what would be the  
32 changes in the GFP expression level caused by a sRNA directed to an internal region of its transcript. For that,  
33 complementary sequences to those regions were introduced as seed sequences, upstream of the MicC scaffold and  
34 the alterations in the GFP expression level were again evaluated by spectrofluorimetry. In agreement with our

35 expectations, the fluorescence level of the strain expressing the synthetic sRNA directed to the 3'-end of the  
36 transcript was raised by about 40% (Fig 3B). In Fig 3C, we also observed a fluorescence increment after induction of  
37 the synthetic sRNA that targets an internal region of the *gfp* transcript (~35%). Although we cannot exclude effects  
38 at the translation level, mRNA stabilization is a more plausible effect when the 3'-region was targeted, due to the  
39 preferred action of exoribonucleases on that region. The higher GFP expression observed after sRNA hybridization to  
40 the internal *gfp* mRNA region might also be due to some stabilizing effect due to occlusion of an endoribonuclease  
41 recognition site.

42 Together these results demonstrate that the type of regulation (up- or down-regulation) achieved for a given  
43 gene is determined by the choice of the mRNA region targeted by the synthetic sRNA. Therefore, this is a versatile  
44 system for modulation of gene expression, with potential to be used for different purposes in synthetic biology.

45

## 46 Discussion

47 In this work we describe the construction and application of a genetic tool for the modulation of gene  
48 expression in *P. putida*. Due to the polluted habitats where this robust bacterium thrives, it is equipped with a large  
49 number of naturally evolved biochemical and physiological traits that makes it a highly attractive production system  
50 for industrial needs (Nikel *et al.* 2018). For this reason, the development of such a regulatory system for specific  
51 application in metabolic engineering in this host is of paramount importance.

52 This genetic tool relies on the induced expression of synthetic sRNAs specifically directed to a chosen target  
53 gene. Despite its specificity, we have managed to show the wide applicability of this tool that can be used to  
54 modulate the expression of virtually any given gene. The choice of the targeted gene is done by simply altering the  
55 “seed sequence”, a small sequence (20-30 nts) that by being complementary to the mRNA target, changes the  
56 specificity of the regulatory sRNA. But the utmost advantage of this system is its versatility, due to its aptitude not  
57 only to downregulate but also to overexpress any gene of interest. This dual system may thus be used to plug-in and  
58 -out genetic circuits for different purposes in synthetic biology.

59 For the construction of this genetic tool we have used an inducible plasmid from the SEVA collection, in  
60 which the expression of the synthetic sRNA is driven from the well-known *P. putida* promoter *XyIS/Pm*. Induction of  
61 this promoter can be graded by using different, non-expensive, benzoic acid derivatives, which enter cells by passive  
62 diffusion and operate in a dose-dependent manner (reviewed by (Gawin *et al.* 2017)). It combines a high expression

53 level with a low fraction of non-induced cells (Calero *et al.* 2016). Cloning of the *E. coli* MicC scaffold under the  
54 control of this promoter allowed to detect its expression readily 15 min after induction with 3MB, whereas no  
55 expression was detected in the non-induced samples, confirming the usability of the XylS/*Pm* promoter in this  
56 system. Further validation of the chosen sRNA scaffold came after binding-shift results, which confirmed the ability  
57 of *P. putida* Hfq to recognize and bind the *E. coli* MicC scaffold. Indeed, our results clearly demonstrate the ability of  
58 the MicC-based synthetic sRNAs to regulate the expression of several targets in *P. putida*.

59 sRNAs are potent regulators of gene expression and, although there is a higher number of examples of  
60 target downregulation, a few cases of target upregulation have also been described (Saramago *et al.* 2014). The  
61 target sequence, the mRNA secondary structure adopted, and the antisense interaction region are among the  
62 important factors for the final outcome. In this work we have thus decided to test various interactions regions,  
63 comprising the whole mRNA molecules of the genes under study. sRNA hybridization in the 5'-region of the mRNA,  
64 comprising the RBS and the start codon, is often associated with translational inhibition due to blockage of ribosome  
65 access (Sharma *et al.* 2007, Bouvier *et al.* 2008, Guillier *et al.* 2008, Prevost *et al.* 2011); for review see (Papenfort *et*  
66 *al.* 2009, Saramago *et al.* 2014). This antisense association region is thereby the preferred one when aiming to  
67 decrease target expression. In agreement with this expectation, the sRNAs directed to the 5'-end of the target  
68 mRNAs – Anti*acnB*-5', Anti*gfp*-5' and Anti*yfp*-5' - resulted in decreased expression levels. This is, however, not  
69 always the case of the sRNAs targeting the 5'-end. There are even some examples of sRNAs promoting translation by  
70 relieving a hairpin that blocks the RBS upon binding (Soper *et al.* 2010, Saramago *et al.* 2014). Indeed, we have  
71 tested two others synthetic sRNAs directed to distinct regions in the 5'-end of the *acnB* and *sdhB* transcripts that  
72 caused no changes in the respective enzymatic activities. Despite they were directed to the 5'-end of both mRNAs,  
73 the translation process seems not to be compromised (data not shown). Alterations in mRNA turnover caused by the  
74 sRNAs may counteract or synergistically favor the translational effects and the final outcome is always the  
75 cumulative result of both mechanisms. Accordingly, analysis of the *acnB* mRNA by Northern blot also revealed  
76 decreased mRNA levels after Anti*acnB*-5' expression, which is indicative of mRNA destabilization by the sRNA. The  
77 double stranded RNA (dsRNA) region created by the sRNA-target mRNA hybridization may generate a specific  
78 cleavage site for the dsRNA specific endoribonuclease RNase III (Viegas *et al.* 2011), presumably leading to the  
79 reduced *acnB* transcript level. Changes in the mRNA structure caused by the sRNA hybridization are also known to  
80 generate new cleavage sites for other ribonucleases, namely RNase E, an endoribonuclease that specifically

91 recognizes and cleaves single-stranded RNA (ssRNA) (Viegas *et al.* 2008, Storz *et al.* 2011, Bandyra *et al.* 2012).  
92 Irrespective of the ribonuclease acting, both effects (inhibition of translation and mRNA destabilization) are probably  
93 accounting for the lower aconitase activity obtained upon *AntiacnB-5'* sRNA induction. Lower succinate  
94 dehydrogenase activity was also observed when expressing the synthetic *AntisdhB*-intra sRNA. In this case however,  
95 only translational effects might be occurring, and mRNA destabilization does not appear to be determinant for the  
96 final measured activity levels, as no difference was observed in the *sdhB* mRNA levels. The reduced translation might  
97 be due to changes in the mRNA structure triggered upon sRNA binding, which would hinder the ribosome access to  
98 the transcription start site. Interestingly targeting an *sdhB* intragenic region resulted in decreased enzyme activity,  
99 whereas targeting a *gfp* intragenic region resulted in increased fluorescence. Despite the discrepancy, this example  
100 illustrates once again the myriad of details when dealing with sRNA regulation, depending on the particularity of  
101 each sRNA-target mRNA pair (Villa *et al.* 2018). We may speculate that in the case of the *Antigfp*-intra sRNA, the  
102 antisense hybridization may be affecting mRNA turnover by blocking an endoribonuclease cleavage site, ultimately  
103 leading to higher *gfp* mRNA levels. Hypothetically, translation may be promoted through alterations in the mRNA  
104 structure following sRNA interaction, or both situations may occur simultaneously accounting for the final  
105 fluorescence levels measured. Induction of the sRNA directed to the 3'-end (*Antigfp-3'*) also raised the fluorescence  
106 levels. The most probable reason for this result is stabilization of the target mRNA by limiting the access of the  
107 exoribonucleases to the 3'-end of the *gfp* transcript. Two exoribonucleases that specifically degrade RNA in the 3' to  
108 5' direction are present in *P. putida* – RNase R and PNPase (Favaro *et al.* 2003, Arraiano *et al.* 2010).

99 sRNAs are known to regulate complex networks through antisense interaction with their targets, and we  
100 have managed to change the expression of several endogenous and reporter genes by using specific synthetic  
101 sRNAs. Our work also emphasises the dynamics and complexity of this process. However, this complexity is what  
102 gives rise to the great potential of this regulatory system, presumably allowing not only different repression but also  
103 overexpression efficiencies. Like in an “haute-couture” atelier, by carefully defining the regions to be targeted, this  
104 genetic toolbox allows a tailor-made design for finely tuning the expression of nearly all genes in the cell.

15

## 16 **Acknowledgments**

17 We are grateful to Prof. Victoria Shingler (Umea University, Sweden) for kindly providing us the *E. coli*  
18 BL21(DE3)-*Δhfq::cat-S4* strain. We also acknowledge Maximilian Ole Bahls, from Prof. Sven Panke Lab (ETH,

19 Switzerland), for kindly providing KT-GFP and KT-YFP strains. We are thankful to Dr. Esteban Martinez from Prof.  
20 Victor de Lorenzo Lab (CNB, Spain) for supplying pSEVA238 plasmid. We also thank Isabel Pacheco and Teresa  
21 Baptista da Silva for technical assistance.

22

23

## 24 Funding

25 This work was funded by project LISBOA-01-0145-FEDER-007660 (Microbiologia Molecular, Estrutural e  
26 Celular) funded by FEDER funds through COMPETE2020 – Programa Operacional Competitividade e  
27 Internacionalização (POCI) and by European Union’s Horizon 2020 Research and Innovation Program, Ref. 635536  
28 and Ref. 810856. Sandra C. Viegas was financed by program IF of FCT (ref IF/00217/2015), and Patrícia Apura was  
29 recipient of an FCT-PhD fellowship (ref PD/BD/128034/764 2016) in frame of the Doctoral Program in Applied and  
30 Environmental Microbiology. In addition, FCT provided postdoctoral grants ref SFRH/BPD/109464/2015 to Margarida  
31 Saramago and ref SFRH/BPD/92687/2013 to Sandra M. Carvalho. Susana Domingues was supported by grant  
32 025/BPD/2015 and Alexandra Peregrina by grant 022/BPD/2018, from European Union’s Horizon 2020 Research and  
33 Innovation Program (Ref. 635536).

34

## 35 Figure Legends

36 **Figure 1 – pSEVA238-based synthetic sRNAs expression system. A)** Insertion of MicC scaffold into pSEVA238  
37 generated a functional segment which includes the *XylS/Pm* promoter (in orange), the MicC scaffold (in blue) with its  
38 transcriptional terminator (in yellow). Constructs were assembled in the pSEVA238 backbone vector bearing a  
39 kanamycin marker ( $Kan^R$ ), the pBBR1 origin of replication, the terminators  $T_1$  and  $T_0$  and the origin of transfer *oriT*. **B)**  
40 Expression of synthetic sRNAs from *P. putida* *XylS/Pm* promoter. Each construct is composed of a seed sequence (in  
41 green), inserted upstream the scaffold of MicC (in blue) in the +1 position of the *XylS/Pm* promoter (in orange). The  
42 MicC transcriptional terminator is shown in yellow. **C)** Expression of MicC scaffold after induction of *XylS/Pm*.  
43 Northern blot analysis of RNA samples extracted at the time points indicated on top of the image, after induction of  
44 *XylS/Pm* with 0.5 mM of 3MB. 15  $\mu$ g of RNA (each lane) were separated on an 8% polyacrylamide/8.3 M urea gel.  
45 The gel was then blotted to a Hybond-N+ membrane and hybridized with a specific probe for MicC sRNA. Details of  
46 RNA extraction and Northern blot procedure are described in Materials and Methods. The radiolabelled Decade

47 Marker RNA (Ambion) is on the left side. The respective sizes are represented in nucleotides (MicC scaffold is 79 nts  
48 long).

49

50 **Figure 2 – Downregulation of TCA enzymes following expression of specific synthetic sRNAs. A)** Predicted

51 hybridization regions of the synthetic sRNAs with the TCA cellular targets. The sequences of the hybridization regions

52 of the sRNAs with the respective targets are represented. For simplicity, only a small region of the target genes

53 sequences is shown (dots are used to represent the remaining sequences). *AntiacnB-5'* hybridizes in the 5'-region of

54 the target, covering the RBS and the translation initiation codon (GTG). *AntisdhB-intra* hybridizes in the target coding

55 sequence. **B)** Enzymatic activities of aconitase (AcnB) and succinate dehydrogenase (SdhB) measured in extracts of *P.*

56 *putida* expressing the synthetic sRNAs *AntiacnB-5'* or *AntisdhB-intra*, respectively. As control (black bars) enzyme

57 activities were measured on cells expressing only the MicC scaffold. Enzyme activities were measured in cell extracts

58 of *P. putida* induced with 1 mM 3MB for 150 min. Error bars represent the mean of two independent determinations

59 done in duplicate. Asterisks represent statistically significant data relative to the control cells. \**P* < 0.05, \*\*\**P* < 0.0001.

50 **C)** Expression of *acnB* and *sdhB* mRNAs after the respective induction of *AntiacnB-5'* and *AntisdhB-intra* as stated on

51 top of the images. The control lanes (MicC Scaffold) show the expression of the same transcripts after induction of

52 MicC scaffold. Northern blot analysis of RNA samples extracted 150 min after induction of *XylIS/Pm* with 1 mM 3MB.

53 15 µg of RNA (each lane) were separated on a 1% agarose gel. The gel was then blotted to a Hybond-N+ membrane

54 and hybridized with specific probes.

55

56 **Figure 3 – Modulation of reporter genes expression by specific synthetic sRNAs.** Fluorescence was measured in

57 growing cultures 150 min after induction of *XylIS/Pm* with 1 or 5 mM of 3MB. Total fluorescence was measured in a

58 FLUOstar OPTIMA machine (BMG Labtech). Fluorescence values in arbitrary units (AU) were corrected to the values

59 of the negative control (*P. putida* KT2440 carrying pSEVA238-MicC) and represented as percentage of the basal

70 fluorescence of the control strain (the same strain, carrying the respective reporter and pSEVA238-MicC). Error bars

71 represent the mean of at least five independent measurements. Asterisks represent statistically significant data

72 relative to the control cells. Ns, not significant, \**P* > 0.05, \*\**P* ≤ 0.01, \*\*\*\**P* ≤ 0.0001. **A)** Fluorescence emission of *P.*

73 *putida* cultures expressing GFP (on the left) or YFP (on the right) after induction of sRNAs directed to the 5'-end of

74 the respective mRNAs (grey bars) or MicC scaffold (black bars) as control. **B)** Fluorescence emission of *P. putida* cells

75 expressing GFP after induction of a synthetic sRNA directed to the 3'-end of the transcript (grey bar) or MicC scaffold  
76 (black bar) as control. C) Fluorescence emission of *P. putida* cells expressing GFP after induction of a synthetic sRNA  
77 directed to the coding sequence of the transcript (grey bar) or MicC scaffold (black bar) as control.

78

## 79 **References**

- 80 Aiba, H. (2007). "Mechanism of RNA silencing by Hfq-binding small RNAs." *Curr Opin Microbiol* **10**: 134-139.
- 81 Amman, F., C. Flamm and I. Hofacker (2012). "Modelling translation initiation under the influence of sRNA." *Int J Mol Sci* **13**:  
82 16223-16240.
- 83 Arraiano, C. M., J. M. Andrade, S. Domingues, I. B. Guinote, M. Malecki, R. G. Matos, *et al.* (2010). "The critical role of RNA  
84 processing and degradation in the control of gene expression." *FEMS Microbiol Rev* **34**: 883-923.
- 85 Bandyra, K. J., N. Said, V. Pfeiffer, M. W. Gorna, J. Vogel and B. F. Luisi (2012). "The seed region of a small RNA drives the  
86 controlled destruction of the target mRNA by the endoribonuclease RNase E." *Mol Cell* **47**: 943-953.
- 87 Bouvier, M., C. M. Sharma, F. Mika, K. H. Nierhaus and J. Vogel (2008). "Small RNA binding to 5' mRNA coding region inhibits  
88 translational initiation." *Mol Cell* **32**: 827-837.
- 89 Calero, P., S. I. Jensen and A. T. Nielsen (2016). "Broad-Host-Range ProUSER Vectors Enable Fast Characterization of Inducible  
90 Promoters and Optimization of p-Coumaric Acid Production in *Pseudomonas putida* KT2440." *ACS Synth Biol* **5**: 741-753.
- 91 Choi, K. H., A. Kumar and H. P. Schweizer (2006). "A 10-min method for preparation of highly electrocompetent *Pseudomonas*  
92 *aeruginosa* cells: application for DNA fragment transfer between chromosomes and plasmid transformation." *J Microbiol*  
93 *Methods* **64**: 391-397.
- 94 de Jong, H., C. Ranquet, D. Ropers, C. Pinel and J. Geiselmann (2010). "Experimental and computational validation of models of  
95 fluorescent and luminescent reporter genes in bacteria." *BMC Syst Biol* **4**: 55.
- 96 Eggenhofer, F., H. Tafer, P. F. Stadler and I. L. Hofacker (2011). "RNApredator: fast accessibility-based prediction of sRNA  
97 targets." *Nucleic Acids Res* **39**: W149-154.
- 98 Favaro, R. and G. Deho (2003). "Polynucleotide phosphorylase-deficient mutants of *Pseudomonas putida*." *J Bacteriol* **185**: 5279-  
99 5286.
- 100 Fernandes, A. S., M. M. Pereira and M. Teixeira (2001). "The succinate dehydrogenase from the thermohalophilic bacterium  
101 *Rhodothermus marinus*: redox-Bohr effect on heme bL." *J Bioenerg Biomembr* **33**: 343-352.
- 102 Gawin, A., S. Valla and T. Brautaset (2017). "The XylS/Pm regulator/promoter system and its use in fundamental studies of  
103 bacterial gene expression, recombinant protein production and metabolic engineering." *Microb Biotechnol* **10**: 702-718.

- 04 Ghodasara, A. and C. A. Voigt (2017). "Balancing gene expression without library construction via a reusable sRNA pool." *Nucleic*  
05 *Acids Res* **45**: 8116-8127.
- 06 Guillier, M. and S. Gottesman (2008). "The 5' end of two redundant sRNAs is involved in the regulation of multiple targets,  
07 including their own regulator." *Nucleic Acids Res* **36**: 6781-6794.
- 08 Hor, J., S. A. Gorski and J. Vogel (2018). "Bacterial RNA Biology on a Genome Scale." *Mol Cell* **70**: 785-799.
- 09 Lee, M. E., A. Aswani, A. S. Han, C. J. Tomlin and J. E. Dueber (2013). "Expression-level optimization of a multi-enzyme pathway in  
10 the absence of a high-throughput assay." *Nucleic Acids Res* **41**: 10668-10678.
- 11 Madhushani, A., T. Del Peso-Santos, R. Moreno, F. Rojo and V. Shingler (2015). "Transcriptional and translational control through  
12 the 5'-leader region of the dmpR master regulatory gene of phenol metabolism." *Environ Microbiol* **17**: 119-133.
- 13 Mahalik, S., A. K. Sharma and K. J. Mukherjee (2014). "Genome engineering for improved recombinant protein expression in  
14 Escherichia coli." *Microb Cell Fact* **13**: 177.
- 15 Markham, N. R. and M. Zuker (2008). "UNAFold: software for nucleic acid folding and hybridization." *Methods Mol Biol* **453**: 3-  
16 31.
- 17 Milligan, J. F., D. R. Groebe, G. W. Witherell and O. C. Uhlenbeck (1987). "Oligoribonucleotide synthesis using T7 RNA  
18 polymerase and synthetic DNA templates." *Nucleic Acids Res* **15**: 8783-8798.
- 19 Na, D., S. M. Yoo, H. Chung, H. Park, J. H. Park and S. Y. Lee (2013). "Metabolic engineering of Escherichia coli using synthetic  
20 small regulatory RNAs." *Nat Biotechnol* **31**: 170-174.
- 21 Nickel, P. I. and V. de Lorenzo (2018). "Pseudomonas putida as a functional chassis for industrial biocatalysis: From native  
22 biochemistry to trans-metabolism." *Metab Eng.*
- 23 Nickel, P. I., E. Martinez-Garcia and V. de Lorenzo (2014). "Biotechnological domestication of pseudomonads using synthetic  
24 biology." *Nat Rev Microbiol* **12**: 368-379.
- 25 Papenfort, K. and J. Vogel (2009). "Multiple target regulation by small noncoding RNAs rewires gene expression at the post-  
26 transcriptional level." *Res Microbiol* **160**: 278-287.
- 27 Prevost, K., G. Desnoyers, J. F. Jacques, F. Lavoie and E. Masse (2011). "Small RNA-induced mRNA degradation achieved through  
28 both translation block and activated cleavage." *Genes Dev* **25**: 385-396.
- 29 Saramago, M., C. Barria, R. F. Dos Santos, I. J. Silva, V. Pobre, S. Domingues, *et al.* (2014). "The role of RNases in the regulation of  
30 small RNAs." *Curr Opin Microbiol* **18**: 105-115.
- 31 Saramago, M., M. Robledo, R. G. Matos, J. I. Jimenez-Zurdo and C. M. Arraiano (2018). "Sinorhizobium meliloti RNase III:  
32 Catalytic Features and Impact on Symbiosis." *Front Genet* **9**: 350.
- 33 Sharma, C. M., F. Darfeuille, T. H. Plantinga and J. Vogel (2007). "A small RNA regulates multiple ABC transporter mRNAs by  
34 targeting C/A-rich elements inside and upstream of ribosome-binding sites." *Genes Dev* **21**: 2804-2817.



- 35 Silva-Rocha, R., E. Martinez-Garcia, B. Calles, M. Chavarria, A. Arce-Rodriguez, A. de Las Heras, *et al.* (2013). "The Standard  
36 European Vector Architecture (SEVA): a coherent platform for the analysis and deployment of complex prokaryotic phenotypes."  
37 *Nucleic Acids Res* **41**: D666-675.
- 38 Soper, T., P. Mandin, N. Majdalani, S. Gottesman and S. A. Woodson (2010). "Positive regulation by small RNAs and the role of  
39 Hfq." *Proc Natl Acad Sci U S A* **107**: 9602-9607.
- 40 Storz, G., J. Vogel and K. M. Wassarman (2011). "Regulation by small RNAs in bacteria: expanding frontiers." *Mol Cell* **43**: 880-  
41 891.
- 42 Tavares, A. F., M. Teixeira, C. C. Romao, J. D. Seixas, L. S. Nobre and L. M. Saraiva (2011). "Reactive oxygen species mediate  
43 bactericidal killing elicited by carbon monoxide-releasing molecules." *J Biol Chem* **286**: 26708-26717.
- 44 Viegas, S. C. and C. M. Arraiano (2008). "Regulating the regulators: How ribonucleases dictate the rules in the control of small  
45 non-coding RNAs." *RNA Biol* **5**: 230-243.
- 46 Viegas, S. C., V. Pfeiffer, A. Sittka, I. J. Silva, J. Vogel and C. M. Arraiano (2007). "Characterization of the role of ribonucleases in  
47 Salmonella small RNA decay." *Nucleic Acids Res* **35**: 7651-7664.
- 48 Viegas, S. C., I. J. Silva, M. Saramago, S. Domingues and C. M. Arraiano (2011). "Regulation of the small regulatory RNA MicA by  
49 ribonuclease III: a target-dependent pathway." *Nucleic Acids Res* **39**: 2918-2930.
- 50 Villa, J. K., Y. Su, L. M. Contreras and M. C. Hammond (2018). "Synthetic Biology of Small RNAs and Riboswitches." *Microbiol*  
51 *Spectr* **6**.
- 52 Wagner, E. G. H. and P. Romby (2015). "Small RNAs in bacteria and archaea: who they are, what they do, and how they do it."  
53 *Adv Genet* **90**: 133-208.
- 54 Yoo, S. M., D. Na and S. Y. Lee (2013). "Design and use of synthetic regulatory small RNAs to control gene expression in  
55 Escherichia coli." *Nat Protoc* **8**: 1694-1707.
- 56

Figure 1

A)

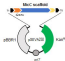

B)

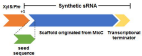

C)

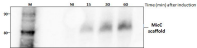

**Figure 2**

**A)**

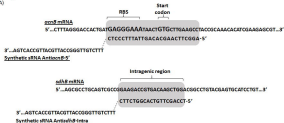

**B)**

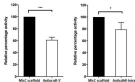

**C)**

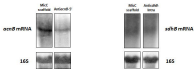

**Figure 3**

**A)**

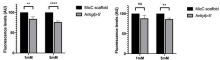

**B)**

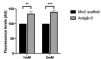

**C)**

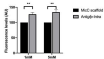

Source: https://www.biorxiv.org/content/10.1101/801027v1.full.pdf
